# Supplementary material for: Virological and Genetic Characterization of the Unusual Avian Influenza H14Nx Viruses in the Northern Asia
Source: MDPI journal article supplement (doi:10.3390/v15030734), 2023-03-11

**Table S1.** Description of isolated strains of AIV of H14 subtype

| Strain name                      | Collection date | Location                               | Host species (lat) | Subtype | Accession num. |
|----------------------------------|-----------------|----------------------------------------|--------------------|---------|----------------|
| A/Common_Teal/Chany_Lake/29/2019 | 2019-09-07      | Chany lake, Novosibirsk region, Russia | Anas crecca        | H14N3   | 400267         |
| A/garganey/Chany_Lake/210/2014   | 2014-08-24      | Chany lake, Novosibirsk region, Russia | Anas querquedula   | H14N9   | 14854178       |
| A/garganey/Chany_Lake/211/2014   | 2014-08-24      | Chany lake, Novosibirsk region, Russia | Anas querquedula   | H14N9   | 14853905       |

**Table S2.** Identity of isolated strains.

| Strain name                              | Segment | Related strain                                             | Identity, % |
|------------------------------------------|---------|------------------------------------------------------------|-------------|
| A/Common_Teal/Chany_Lake/29/2019 (H14N3) | PB2     | A/mallard/Omsk Region/63/2019 (A/H3N8)                     | 99.57       |
|                                          | PB1     | A/chicken/Poland/004/2020 (A/H5N8)                         | 99.27       |
|                                          | PA      | A/mallard/Toguchin/13/2017 (A/H4N6)                        | 99          |
|                                          | HA      | A/sandpiper/Tomsk/112/2019 (A/H14N7)                       | 98.65       |
|                                          | NA      | A/mallard/Chany Lake/18/2018 (A/H1N3)                      | 99.51       |
|                                          | NP      | A/mallard/Omsk Region/63/2019 (A/H3N8)                     | 99.67       |
|                                          | MP      | A/mallard/Chany Lake/18/2018 (A/H1N3)                      | 99.9        |
|                                          | NS      | A/White-fronted goose/South Korea/KNU2019-39/2019 (A/H7N7) | 99.77       |
| A/garganey/Chany_Lake/210/2014 (H14N9)   | PB2     | A/tufted duck/Georgia/1/2012 (A/H2N3)                      | 99.19       |
|                                          | PB1     | A/shoveler/Chany/82K/2014 (A/H3N8)                         | 98.63       |
|                                          | PA      | A/teal/Egypt/MB-D-125OP/2015 (A/H7N3)                      | 98.61       |
|                                          | HA      | A/goose/Karachi/NARC-13N-969/2014 (A/H14N3)                | 98.24       |
|                                          | NA      | A/Anas platyrhynchos/Belgium/195_7/2018 (A/H11N9)          | 98.88       |
|                                          | NP      | A/environment/Kamchatka/18/2016 (A/H5N5)                   | 99.62       |
|                                          | MP      | A/mallard/Chany/355/2016 (A/H1N1)                          | 99.51       |
|                                          | NS      | A/teal/Egypt/MB-D-621C/2016 (A/H7N9)                       | 99.33       |
| A/garganey/Chany_Lake/211/2014 (H14N9)   | PB2     | A/mallard/Chany/260U/2014 (A/H5N3)                         | 98.33       |
|                                          | PB1     | A/shoveler/Chany/82K/2014 (A/H3N8)                         | 98.58       |
|                                          | PA      | A/teal/Egypt/MB-D-125OP/2015 (A/H7N3)                      | 98.61       |
|                                          | HA      | A/goose/Karachi/NARC-13N-969/2014 (A/H14N3)                | 98.24       |
|                                          | NA      | A/Anas platyrhynchos/Belgium/195_7/2018 (A/H11N9)          | 98.88       |
|                                          | NP      | A/environment/Kamchatka/18/2016 (A/H5N5)                   | 99.55       |
|                                          | MP      | A/mallard/Chany/355/2016 (A/H1N1)                          | 99.51       |

|  |    |                                      |       |
|--|----|--------------------------------------|-------|
|  | NS | A/teal/Egypt/MB-D-621C/2016 (A/H7N9) | 99.21 |
|--|----|--------------------------------------|-------|

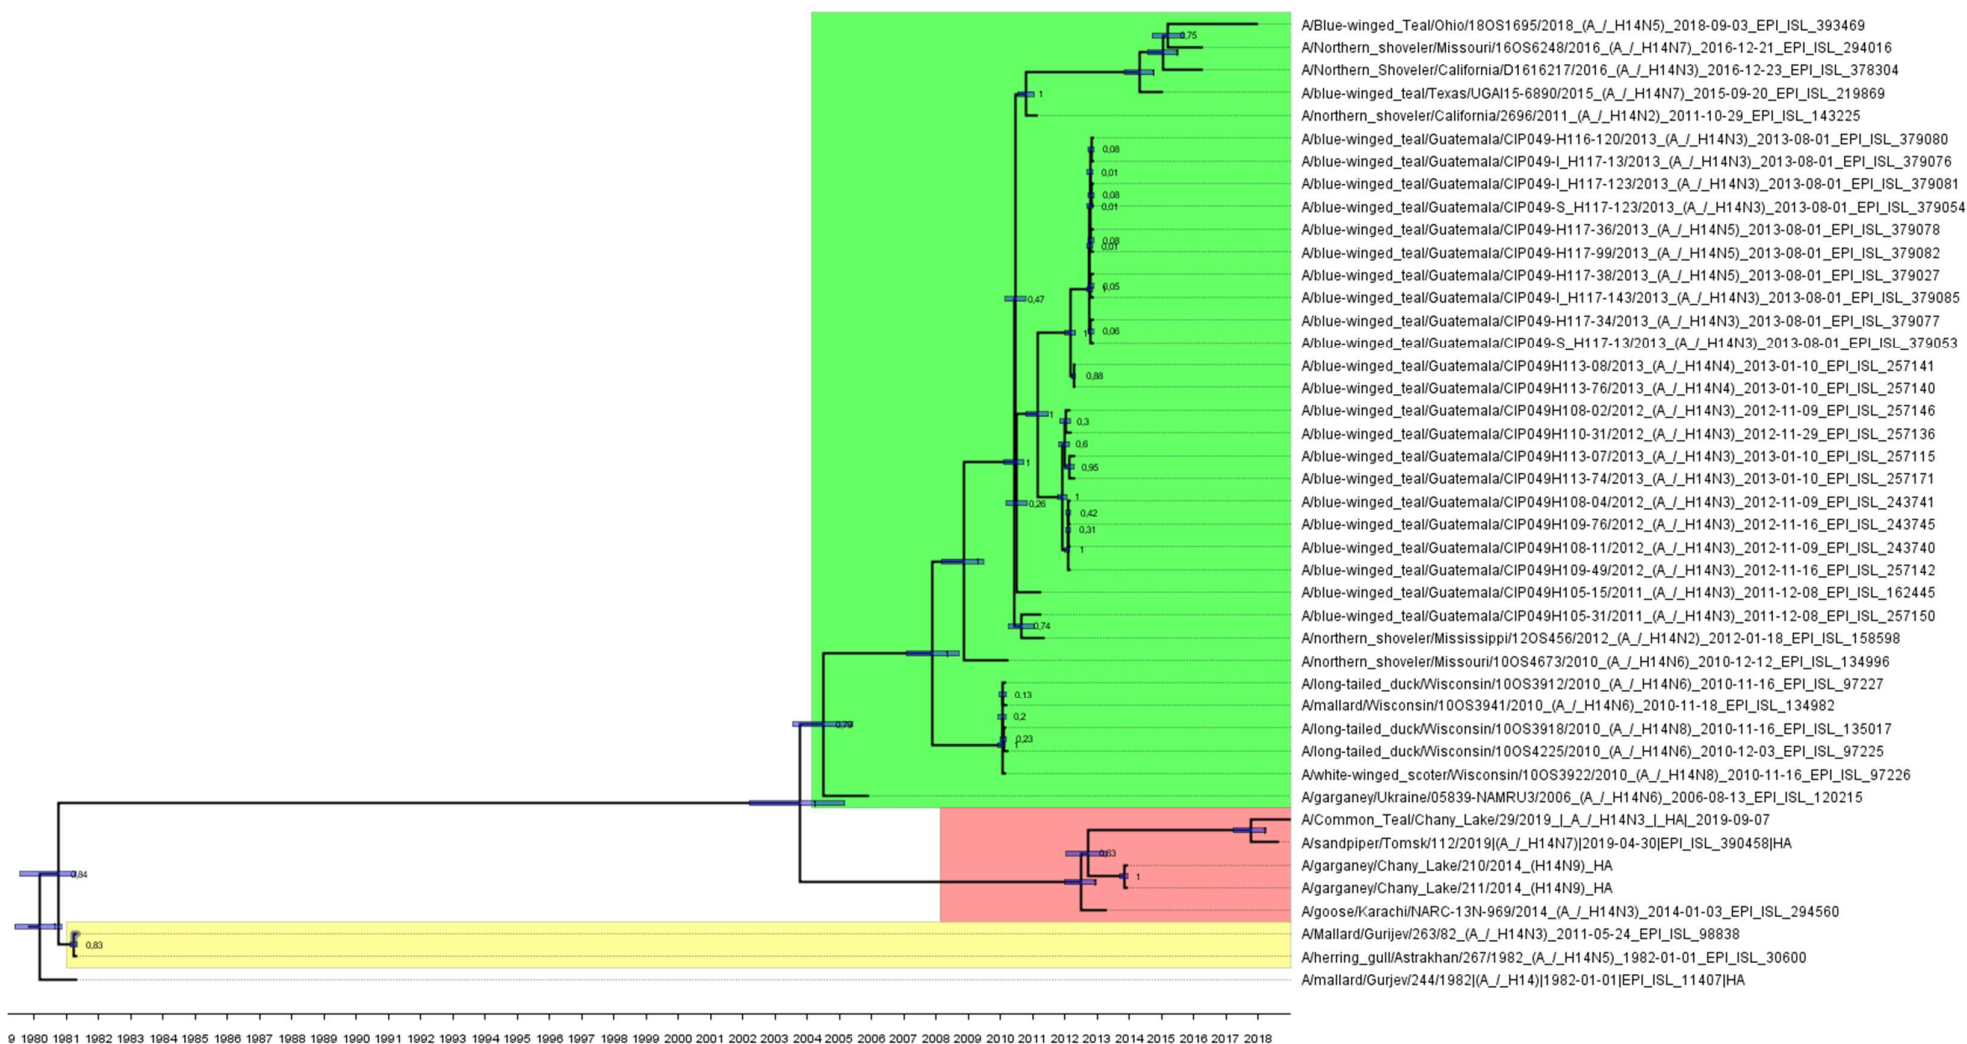

**Figure S1.** Time-calibrated phylogeny of nucleotide sequences of HA segments. H14.2.1 clade highlighted with red, H.14.2.2 clade highlighted with green. Node labels represent posterior probability, node bars represent 95% HPD interval.

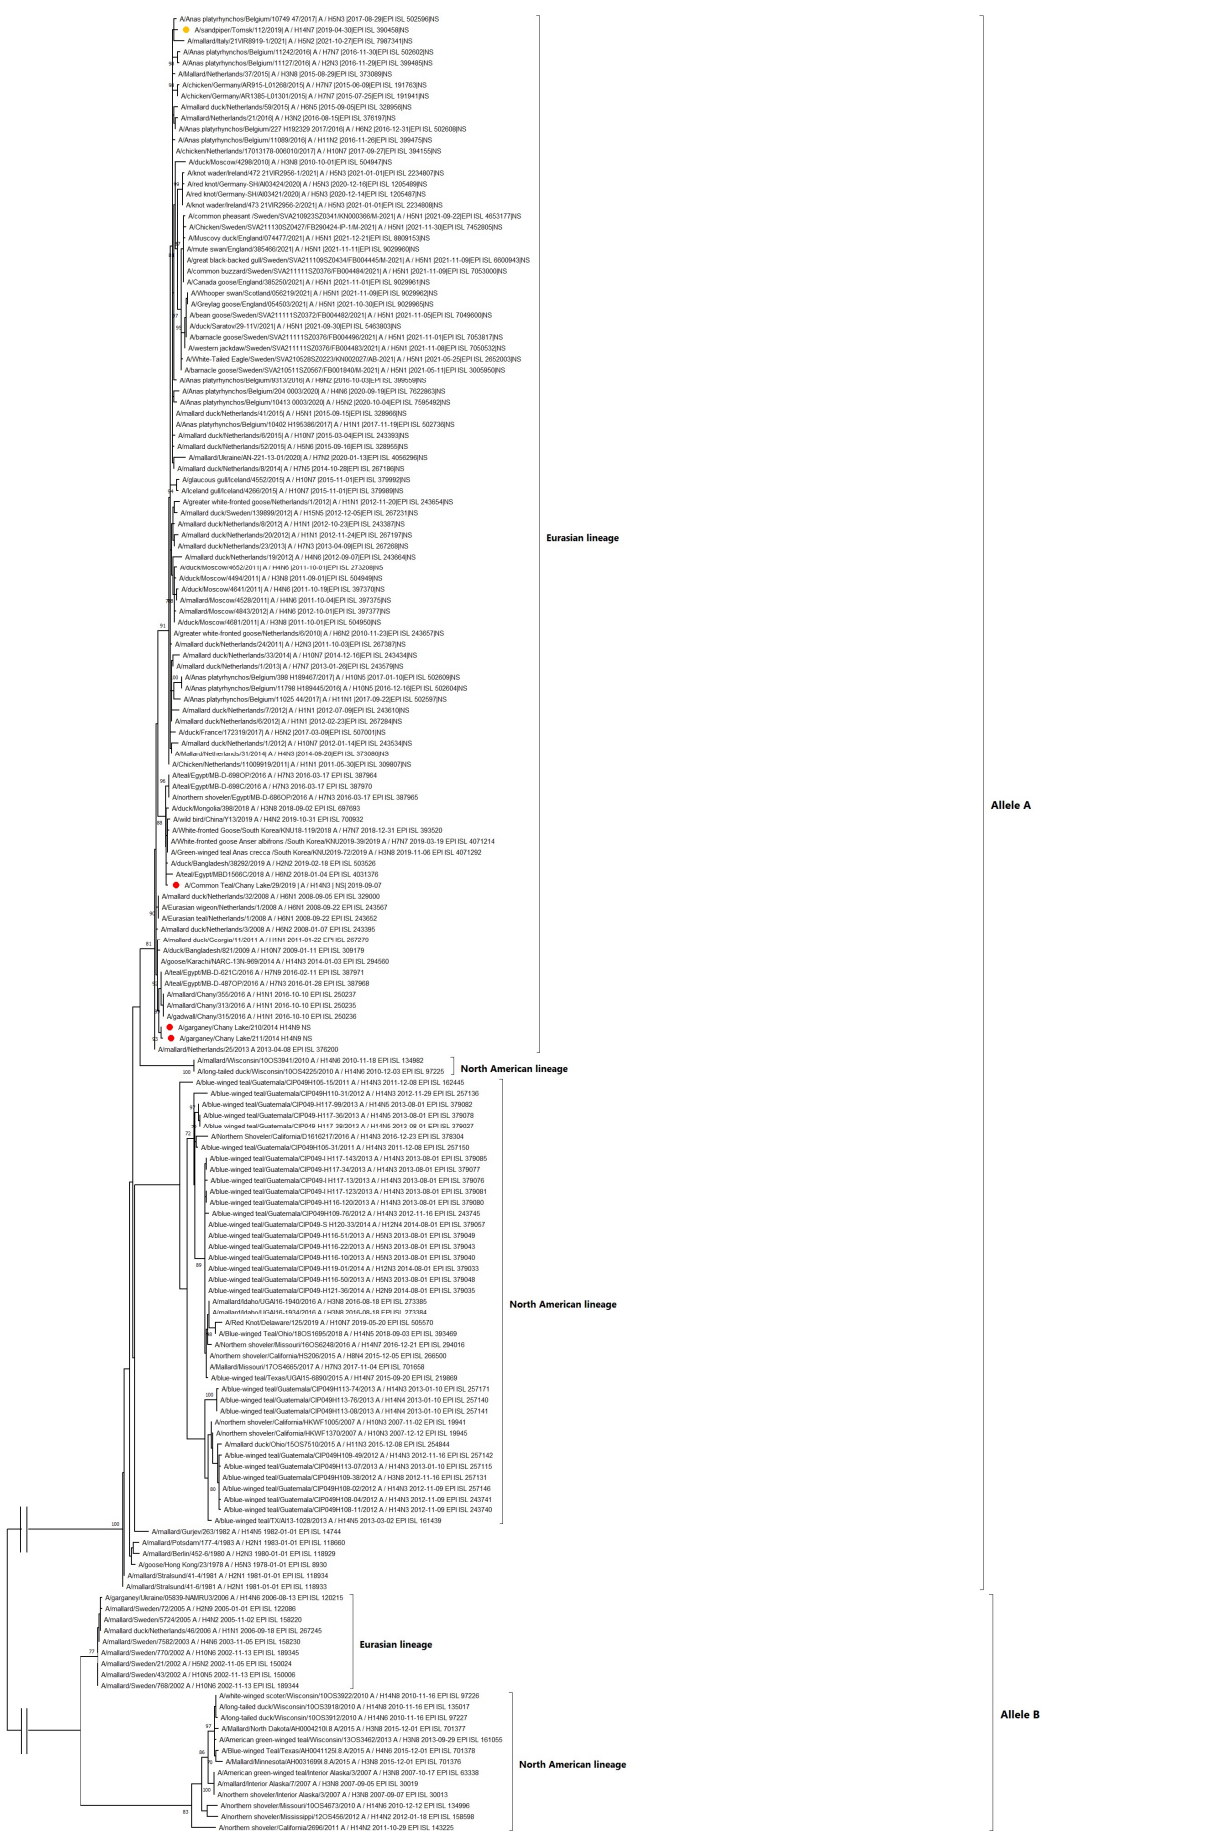

Supplement: s1 [file s1]
